# Supplementary material for: Practice before theory? An approach for testing sequencing effects in pedagogical design
Source: Springer Nature journal article supplement (doi:10.1007/s10798-020-09579-w), 2020-04-19
Supplement: MOESM1 [file 17908768]

## **REFUGEE SHELTER DESIGN WORKSHOP TEST**

Answer **ALL** questions

Questions **do not** carry equal marks

Maximum marks 40

Use the supplied Multiple Choice sheet for providing your answers.

Only use a HB pencil to strike out the letter you think is correct.

If you make a mistake use an eraser.

Please do not use ticks, crosses or circles.

**USE A SEPARATE PAPER FOR WORKING OUT YOUR ANSWERS, IF NEEDED.**

**CANDIDATES MUST NOT TURN OVER THE PAGE AND READ THE EXAMINATION PAPER  
UNTIL THE CHIEF INVIGILATOR GIVES PERMISSION TO DO SO**

- Q1 Which of the following materials (if any) are **not** used as thermal insulators in building construction? (2 marks)
- (A) Rock wool.
  - (B) Concrete.
  - (C) Expanded polystyrene.
  - (D) Hemp.
  - (E) All of the above materials are used.
- Q2 Fabric heat transfer is **primarily**: (2 marks)
- (A) Conductive.
  - (B) Radiative.
  - (C) Convective.
  - (D) Evaporative.
  - (E) None of the above.
- Q3 Heat transfer by ventilation is **primarily**: (2 marks)
- (A) Conductive.
  - (B) Radiative.
  - (C) Convective.
  - (D) Evaporative.
  - (E) None of the above.
- Q4 The U-value is defined in which of the following units? (2 marks)
- (A)  $Wm^{-2}K^{-1}$ .
  - (B)  $m^2KW^{-1}$ .
  - (C)  $Wm^{-1}K^{-1}$ .
  - (D)  $mKW^{-1}$ .
  - (E) None of the above.
- Q5 Thermal conductivity is defined in which of the following units? (2 marks)
- (A)  $Wm^{-2}K^{-1}$ .
  - (B)  $m^2KW^{-1}$ .
  - (C)  $Wm^{-1}K^{-1}$ .
  - (D)  $mKW^{-1}$ .
  - (E) None of the above.
- Q6 Which of the following wall build-ups is likely to have the lowest U-value? All constructions are shown from outside (left) to inside (right). (2 marks)
- (A) 230mm solid brick.
  - (B) 115mm brick - 50mm air gap - 115mm brick - 12mm plaster.
  - (C) 115mm brick - 50mm air gap - 50mm rigid wood fibre insulation - 2 coats of render.
  - (D) 2 coats of render - airtight membrane - 50mm rigid wood fibre insulation - 50mm airgap - 115mm brick - 12mm plaster.
  - (E) 115mm brick - 100mm rigid wood fibre insulation - 2 coats of render.

- Q7 You design a three story residential building with the physical characteristics given in **Table Q7-1** below. Additionally the air tightness (infiltration rate) is measured at 0.8 ach and you install a ventilation system with a flow rate of 1200 m<sup>3</sup>/h.

**Table Q7-1**

| Element          | Dimensions    | U-Value [W/m <sup>2</sup> K] |
|------------------|---------------|------------------------------|
| Total Windows    | 8 × 1 m × 1 m | 0.75                         |
| North/South Wall | 5 m × 7.5 m   | 0.24                         |
| East/West Wall   | 10 m × 7.5 m  | 0.24                         |
| Ceiling/Roof     | 10 m × 5 m    | 0.20                         |
| Floor            | 10 m × 5 m    | 0.14                         |

Given a 20°C temperature difference between inside and out, calculate the total heat gain rate (to 2 s.f.) and choose the answer from A-E below that is correct (if any). You may find the following equations useful: (5 marks)

$$N = \frac{\text{flow rate}}{\text{volume}} + \text{infiltration rate} \quad | \quad Q_{\text{fabric}} = \sum_i U_i A_i \Delta T \quad | \quad Q_{\text{ventilation}} = \frac{1}{3} NV \Delta T$$

- (A) 1 kW  
 (B) 11 kW  
 (C) 17 kW  
 (D) 9 MW  
 (E) None of the above
- Q8 Compute the U-value of the following sandwich panel roof construction. Assume internal and external surface resistances are 0.1 m<sup>2</sup>KW<sup>-1</sup> and 0.04 m<sup>2</sup>KW<sup>-1</sup> respectively. (5 marks)

**Table Q8-1**

| Material            | Thermal Conductivity<br>$\lambda$ [Wm <sup>-1</sup> K <sup>-1</sup> ] | Thickness<br>d [mm] |
|---------------------|-----------------------------------------------------------------------|---------------------|
| Corrugated top skin | 45                                                                    | 5                   |
| EPS Core            | 0.04                                                                  | 75                  |
| Bottom skin         | 45                                                                    | 3                   |

Now select the value from the list below that most closely matches yours:

- (A) 0.496  
 (B) 0.500  
 (C) 0.684  
 (D) 0.648  
 (E) 0.469

Q9 Which of the following represents heat capacity of a building element? (2 marks)

- (A)  $Wm^{-2}K^{-1}$
- (B)  $Jm^{-2}K^{-1}$
- (C)  $Wm^{-1}K^{-1}$
- (D)  $m^2K^1J^{-1}$
- (E) None of the above

Q10 A heavyweight building is likely to have a thermal lag of at least: (2 marks)

- (A) 1 hour
- (B) 5 K
- (C) 10 K
- (D) 10 hours
- (E) None of the above

Q11 If  represents mass and  represents insulation, which of the following wall configurations represents a heavyweight building? (2 marks)

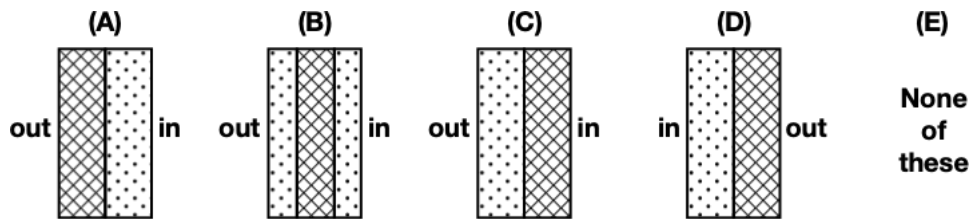

Q12 For the same thickness, which of the following materials is likely to provide the greatest thermal mass in a building? (2 marks)

- (A) Rammed earth
- (B) Concrete
- (C) Brick
- (D) Wood
- (E) Water

Q13 The shelter you have designed has a 50mm cavity for insulation. Which of the following products would you choose to achieve the greatest insulation effect, if each has the same cost? (2 marks)

- (A) Glassfibre ( $\lambda = 0.038 Wm^{-1}K^{-1}$ )
- (B) Phenolic foam ( $\lambda = 0.020 Wm^{-1}K^{-1}$ ).
- (C) Expanded polystyrene (EPS) ( $\lambda = 0.035 Wm^{-1}K^{-1}$ ).
- (D) Hemp ( $\lambda = 0.040 Wm^{-1}K^{-1}$ ).
- (E) Any of the above materials are suitable.

- Q14 Which of the following passive design measures will **not** reduce peak internal summer temperatures in the northern hemisphere? (2 marks)
- (A) Roof overhang.
  - (B) Large windows facing south.
  - (C) Wall cavities filled with gravel.
  - (D) Stack effect ventilation.
  - (E) Ventilated wall cavities.
- Q15 When fitting 15mm thick EPS rolls of thermal insulation within a cavity of a shelter, which of the following will achieve the most airtight construction? (2 marks)
- (A) Butt joint insulation panels.
  - (B) Overlap insulation by a minimum of 50mm.
  - (C) Leave ventilation gaps of at least 10mm between adjacent insulation panels.
  - (D) Ensure insulation panels have no gaps where they meet and tape all joints.
  - (E) Stop insulation 150mm above the floor to provide insulation.
- Q16 To maximise controlled ventilation, which pattern of the following will have the best effect? (2 marks)
- (A) Two windows on adjacent walls.
  - (B) Two windows on opposite walls.
  - (C) No windows.
  - (D) Two windows on the same wall.
  - (E) One window on the wall facing the prevailing wind.
- Q17 You are constructing a shelter with thermal mass in the cavity. You have the option to include a 30mm layer of insulation into the wall construction. Which is the best place to position the insulation layer? (2 marks)
- (A) On the external face of the thermal mass.
  - (B) On the internal face of the thermal mass.
  - (C) In the centre of the thermal mass.
  - (D) On both sides of the thermal mass.
  - (E) It is better to use no insulation.
